# Supplementary material for: Whole-Genome Analysis of Temporal Gene Expression during Foregut Development
Source: PubMed Central journal article supplement (PMC523228; doi:10.1371/journal.pbio.0020352), 2004-10-19
Supplement: pbio.0020352.sd001.pdf [file pbio.0020352.sd001.pdf]

## Supplemental Information

### **Position Weight Matrices from Improbizer**

#### PHA-4 (from Ph-E and Ph-L, respectively):

7.4786 TGTTTGCC  
a 0.003 0.003 0.003 0.040 0.003 0.003 0.113 0.259  
c 0.003 0.003 0.003 0.113 0.040 0.003 0.442 0.296  
g 0.003 0.990 0.003 0.186 0.003 0.990 0.296 0.223  
t 0.990 0.003 0.990 0.662 0.954 0.003 0.149 0.223

8.1637 TTGTTTGC  
a 0.127 0.003 0.003 0.003 0.003 0.003 0.003 0.065  
c 0.250 0.003 0.003 0.003 0.003 0.003 0.003 0.682  
g 0.127 0.065 0.990 0.003 0.065 0.127 0.990 0.003  
t 0.497 0.928 0.003 0.990 0.928 0.867 0.003 0.250

#### Early-1:

7.4694 AGAGACGAAG  
a 0.435 0.034 0.867 0.003 0.867 0.127 0.003 0.650 0.466 0.249  
c 0.096 0.065 0.065 0.065 0.126 0.651 0.003 0.251 0.219 0.157  
g 0.281 0.898 0.003 0.929 0.003 0.096 0.990 0.065 0.065 0.343  
t 0.188 0.003 0.065 0.003 0.003 0.126 0.003 0.034 0.250 0.250

#### Early-2:

7.4500 TCTGACCGT  
a 0.219 0.003 0.003 0.003 0.960 0.003 0.003 0.034 0.158  
c 0.065 0.712 0.158 0.281 0.003 0.959 0.743 0.065 0.003  
g 0.126 0.003 0.003 0.713 0.003 0.003 0.250 0.528 0.219  
t 0.590 0.281 0.836 0.003 0.034 0.034 0.003 0.373 0.620

#### Early-3:

7.6078 AAAAAAGTGGGA  
a 0.497 0.435 0.528 0.466 0.620 0.713 0.188 0.342 0.003 0.219 0.003 0.497  
c 0.096 0.158 0.065 0.281 0.065 0.003 0.003 0.003 0.003 0.003 0.003 0.219  
g 0.281 0.342 0.312 0.188 0.188 0.219 0.805 0.003 0.990 0.774 0.990 0.188  
t 0.126 0.065 0.096 0.065 0.127 0.065 0.003 0.651 0.003 0.003 0.003 0.096

#### Late-1:

8.6489 GGGAGGCGGGGA  
a 0.378 0.207 0.310 0.582 0.037 0.003 0.037 0.003 0.276 0.139 0.310 0.378  
c 0.105 0.037 0.275 0.071 0.071 0.412 0.684 0.003 0.003 0.105 0.037 0.207  
g 0.412 0.752 0.310 0.344 0.820 0.582 0.003 0.990 0.718 0.650 0.582 0.310  
t 0.105 0.003 0.105 0.003 0.071 0.003 0.275 0.003 0.003 0.105 0.071 0.105

#### Late-2:

7.61 TTTTTCC  
a 0.352 0.003 0.003 0.003 0.032 0.003 0.003  
c 0.090 0.032 0.090 0.003 0.003 0.990 0.990  
g 0.003 0.003 0.003 0.003 0.119 0.003 0.003  
t 0.555 0.961 0.904 0.990 0.845 0.003 0.003

#### Late-3:

7.6973 TCTCGGAA  
a 0.188 0.003 0.065 0.003 0.003 0.003 0.682 0.497  
c 0.003 0.867 0.065 0.805 0.003 0.003 0.188 0.003  
g 0.127 0.127 0.003 0.188 0.990 0.990 0.003 0.250  
t 0.682 0.003 0.867 0.003 0.003 0.003 0.127 0.250

#### PI:

7.1263 TTTTCACCAG  
a 0.185 0.211 0.029 0.003 0.003 0.912 0.029 0.003 0.315 0.341  
c 0.133 0.029 0.237 0.029 0.757 0.081 0.964 0.964 0.237 0.159  
g 0.211 0.341 0.003 0.029 0.185 0.003 0.003 0.029 0.185 0.393  
t 0.471 0.419 0.730 0.938 0.055 0.003 0.003 0.003 0.263 0.107

7.1440 TGGGCTCAC

|   |       |       |       |       |       |       |       |       |       |
|---|-------|-------|-------|-------|-------|-------|-------|-------|-------|
| a | 0.250 | 0.144 | 0.109 | 0.003 | 0.003 | 0.215 | 0.038 | 0.743 | 0.039 |
| c | 0.039 | 0.144 | 0.038 | 0.039 | 0.955 | 0.038 | 0.814 | 0.039 | 0.955 |
| g | 0.321 | 0.392 | 0.462 | 0.920 | 0.039 | 0.003 | 0.003 | 0.145 | 0.003 |
| t | 0.391 | 0.320 | 0.391 | 0.038 | 0.003 | 0.744 | 0.144 | 0.074 | 0.003 |

P2:

7.6779 TCTTCCAAA

|   |       |       |       |       |       |       |       |       |       |
|---|-------|-------|-------|-------|-------|-------|-------|-------|-------|
| a | 0.180 | 0.003 | 0.003 | 0.109 | 0.003 | 0.003 | 0.779 | 0.743 | 0.532 |
| c | 0.003 | 0.497 | 0.039 | 0.003 | 0.955 | 0.990 | 0.179 | 0.003 | 0.180 |
| g | 0.109 | 0.003 | 0.003 | 0.003 | 0.039 | 0.003 | 0.003 | 0.215 | 0.003 |
| t | 0.708 | 0.497 | 0.955 | 0.885 | 0.003 | 0.003 | 0.039 | 0.039 | 0.285 |

The PWMs are shown with their associated Improbizer score and the 'best match' sequence to the PWM. The score is used as a measure of significance by comparing motif scores to scores generated by control runs of Improbizer against randomized sequence.
