# Supplementary material for: Whole-Genome Analysis of Temporal Gene Expression during Foregut Development
Source: PubMed Central journal article supplement (PMC523228; doi:10.1371/journal.pbio.0020352), 2004-10-19
Supplement: pbio.0020352.st001.pdf [file pbio.0020352.st001.pdf]

| <b>Gene</b>     | <b>Name</b>   | <b>Predicted Product and/or Function</b>                                | <b>Expression (Ref)</b>                                                                                           | <b>LG</b> |
|-----------------|---------------|-------------------------------------------------------------------------|-------------------------------------------------------------------------------------------------------------------|-----------|
| B0238.12        |               | Trypsin inhibitor like                                                  | ND                                                                                                                | V         |
| B0507.1         |               | EGF-like, Worm-specific repeat type 1                                   | Pharynx (YK)                                                                                                      | V         |
| C01B10.5        | <i>hil-7</i>  | Histone H1.1                                                            | Ubiquitous<br>(Jedrusik and Schulze, 2001)                                                                        | IV        |
| <b>C02B10.3</b> |               | EGF                                                                     | ND                                                                                                                | IV        |
| <b>C02B8.4</b>  | <i>hlh-8</i>  | Helix-loop-helix protein involved in muscle development                 | Non-pharyngeal muscles and neurons (Harfe <i>et al.</i> 1998)                                                     | X         |
| C02C2.3         | <i>cup-4</i>  | Neurotransmitter-gated ion-channel required for coelomocyte endocytosis | ND                                                                                                                | III       |
| C02D5.3         |               | Glutathione S-transferase                                               | ND                                                                                                                | III       |
| C03A3.1         |               | Protein of unknown function                                             | ND                                                                                                                | X         |
| C03A7.14        | <i>abu-8</i>  | DUF139 containing protein                                               | ND                                                                                                                | V         |
| C03A7.4         | <i>pqn-5</i>  | DUF139 containing protein                                               | ND                                                                                                                | V         |
| C03A7.7         | <i>abu-6</i>  | DUF139 containing protein                                               | Pharynx (YK)                                                                                                      | V         |
| C03A7.8         | <i>abu-7</i>  | DUF139 containing protein                                               | ND                                                                                                                | V         |
| <b>C03C10.5</b> |               | Protein of unknown function                                             | ND                                                                                                                | III       |
| C04E6.12        |               | Trypsin inhibitor like                                                  | ND                                                                                                                | V         |
| C04F12.9        |               | RNase H                                                                 | ND                                                                                                                | I         |
| C05E11.8        | <i>flp-12</i> | FMRFamide-like peptide neurotransmitter                                 | Non-pharyngeal neurons (Li <i>et al.</i> 1999)                                                                    | X         |
| C06E4.2         |               | Protein of unknown function                                             | ND                                                                                                                | IV        |
| C06G1.2         |               | Protein of unknown function                                             | ND                                                                                                                | X         |
| <b>C06G1.4</b>  |               | Protein of unknown function                                             | strong anterior expression, including pharyngeal cells (YK)                                                       | X         |
| <b>C07D10.5</b> |               | Protein of unknown function                                             | Intestine and weak pharynx (YK)                                                                                   | II        |
| <b>C07E3.7</b>  |               | Homeobox protein                                                        | ND                                                                                                                | II        |
| C10G8.2         |               | Kunitz/Bovine pancreatic trypsin inhibitor                              | ND                                                                                                                | V         |
| C10G8.5         | <i>ncx-2</i>  | Na-Ca exchanger protein                                                 | Pharynx (YK)                                                                                                      | V         |
| <b>C10G8.6</b>  | <i>ceh-34</i> | Homeodomain, similar to SIX2                                            | Late Pharynx (Dozier <i>et al.</i> , 2001; C. Dozier, G. Cassata, G. Niklaus, H. Kagoshima, and T. Burglin, pers. | V         |

|                 |               |                                                                             |                                                                          |     |
|-----------------|---------------|-----------------------------------------------------------------------------|--------------------------------------------------------------------------|-----|
|                 |               |                                                                             | Comm.)                                                                   |     |
| C14B9.2         |               | Thioredoxin, disulphide isomerase                                           | Pharynx (YK)                                                             | III |
| C14C11.8        | <i>pqn-13</i> | DUF139 containing protein                                                   | Early pharynx muscle and marginal cells (YK, Ao <i>et al.</i> )          | V   |
| C14C6.5         |               | ShTK containing protein                                                     | ND                                                                       | V   |
| C15H9.9         |               | Protein of unknown function                                                 | Pharynx marginal cells and non-pharyngeal head cells (Ao <i>et al.</i> ) | X   |
| <b>C17E4.2</b>  |               | Myosin heavy chain like                                                     | Broad embryonic (IH)                                                     | I   |
| C18A11.1        |               | Protein of unknown function                                                 | ND                                                                       | X   |
| <b>C18D1.1</b>  | <i>die-1</i>  | C2H2 zinc finger, required for morphogenesis of several tissues             | Pharynx, hypodermis, muscle, intestine (Heid <i>et al.</i> 2001)         | II  |
| C18H9.6         |               | Protein of unknown function                                                 | ND                                                                       | II  |
| C23H3.9         |               | Metallo-beta-lactamase superfamily member                                   | Pharynx (YK)                                                             | II  |
| C24A3.2         |               | Protein of unknown function                                                 | ND                                                                       | X   |
| <b>C24H12.1</b> |               | Cyclin-like F-box                                                           | ND                                                                       | II  |
| <b>C24H12.7</b> |               | Cyclin-like F-box                                                           | ND                                                                       | II  |
| C25A11.4        | <i>ajm-1</i>  | Apical junction proteins                                                    | Epithelia: pharynx, hypodermis, intestine (Mohler <i>et al.</i> 1998)    | X   |
| <b>C25B8.4</b>  |               | C-type lectin                                                               | Pharynx (YK)                                                             | X   |
| <b>C25G6.2</b>  | <i>tsp-9</i>  | Tetraspanin integral membrane protein                                       | Neuronal (YK)                                                            | X   |
| C27A2.5         |               | 4Fe-4S ferredoxin, alpha defensin                                           | ND                                                                       | II  |
| C27C12.6        |               | Doublesex-like                                                              | Pharynx (JG, unpub obs)                                                  | X   |
| <b>C30E1.5</b>  |               | Protein of unknown function                                                 | ND                                                                       | X   |
| C30G12.1        |               | Protein of unknown function                                                 | ND                                                                       | II  |
| C32H11.5        |               | Protein of unknown function                                                 | ND                                                                       | IV  |
| <b>C33D9.8</b>  |               | Human microtubule-vesicle linker CLIP-170 like, contains tropomyosin domain | ND                                                                       | IV  |
| <b>C34F6.6</b>  |               | Protein of unknown function                                                 | ND                                                                       | X   |
| <b>C36A4.10</b> |               | Protein of unknown function                                                 | ND                                                                       | III |
| C36H8.2         | <i>inx-6</i>  | Innexin                                                                     | Pharynx (Starich <i>et al.</i> , 2001 and Phelan and                     | IV  |

|                 |               |                                                                                              |                                                                      |    |
|-----------------|---------------|----------------------------------------------------------------------------------------------|----------------------------------------------------------------------|----|
|                 |               |                                                                                              | Starich, 2001)                                                       |    |
| C37H5.13        |               | Acyl-CoA thioesterase                                                                        | ND                                                                   | V  |
| <b>C39F7.2</b>  |               | Contains C3HC4 RING finger (zinc finger), fibronectin type III domain, and B-box zinc finger | ND                                                                   | V  |
| <b>C40A11.2</b> |               | Lipase (class 3), BTB/POZ, and K+ channel tetramerisation domains                            | ND                                                                   | II |
| <b>C40A11.6</b> |               | BTB/POZ and K+ channel tetramerisation domains                                               | ND                                                                   | II |
| C44H4.1         |               | Leucine Rich Repeat protein                                                                  | Pharynx (Gaudet and Mango, 2002)                                     | X  |
| C45B11.2        |               | Epoxide hydrolase like                                                                       | Maternal/early embryo (YK)                                           | V  |
| <b>C46H11.8</b> |               | ShTK containing protein                                                                      | Pharynx gland cells (Ao <i>et al.</i> )                              | I  |
| C46H11.9        |               | ShTK containing protein                                                                      | Pharynx (YK)                                                         | I  |
| C49G7.4         |               | ShTK containing protein                                                                      | Pharynx gland cells (Ao <i>et al.</i> )                              | V  |
| C50B8.4         |               | Protein of unknown function                                                                  | ND                                                                   | V  |
| C53B7.1         | <i>rig-3</i>  | Neuronal IGCAM, member of immunoglobulin superfamily                                         | Pharyngeal and non-pharyngeal neurons (Aurelio <i>et al.</i> , 2002) | X  |
| C53C11.3        | <i>ptr-5</i>  | Patched related                                                                              | Non-pharyngeal neurons (YK)                                          | X  |
| C53C9.2         |               | Calponin family member                                                                       | Body muscle (YK)                                                     | X  |
| C54G4.4         |               | Sushi repeats, C-type lectin domain                                                          | Intestine (YK)                                                       | I  |
| C55A6.6         |               | Alcohol dehydrogenase                                                                        | ND                                                                   | V  |
| CD4.9           |               | Low-density lipoprotein receptor, class A                                                    | ND                                                                   | V  |
| D1009.5         |               | Tctex-1 (dynein light chain) family member                                                   | ND                                                                   | X  |
| D1054.8         |               | Alcohol/short chain dehydrogenase                                                            | ND                                                                   | V  |
| D1054.9         |               | Protein of unknown function                                                                  | Pharynx (YK)                                                         | V  |
| D2024.4         |               | Protein of unknown function                                                                  | ND                                                                   | IV |
| D2092.6         |               | Protein of unknown function                                                                  | ND                                                                   | I  |
| D2096.6         |               | Protein of unknown function                                                                  | Pharynx (Gaudet and Mango, 2002)                                     | IV |
| DY3.5           | <i>pqn-26</i> | Protein of unknown function                                                                  | ND                                                                   | I  |
| <b>E01G4.5</b>  |               | Serpin (serine protease inhibitor) and lipocalin domains                                     | Gonad/germline and maternal (YK)                                     | II |

|                  |                 |                                                  |                                                                                                    |     |
|------------------|-----------------|--------------------------------------------------|----------------------------------------------------------------------------------------------------|-----|
| E01G6.1          |                 | Kunitz/Bovine pancreatic trypsin inhibitor       | Pharynx (YK)                                                                                       | X   |
| <b>F01E11.1</b>  |                 | UDP-glucurosyltransferase                        | Broad but pharynx-enriched (YK)                                                                    | X   |
| F07C4.11         |                 | ShTK containing protein                          | ND                                                                                                 | V   |
| F07H5.6          |                 | Protein of unknown function                      | ND                                                                                                 | II  |
| F08B12.1         |                 | Glucagon/GIP/secretin/VIP family member          | Pharynx (YK)                                                                                       | X   |
| F08B12.4         |                 | Protein of unknown function                      | Pharynx (YK)                                                                                       | X   |
| F08B4.2          | <i>cdh-5</i>    | Cadherin                                         | ND                                                                                                 | IV  |
| <b>F08C6.3</b>   |                 | Vps52/Sac2 family                                | Gonad/germline (YK)                                                                                | X   |
| <b>F08G12.10</b> | <i>inx-2</i>    | Innexin                                          | Ubiquitous in embryo, pharynx in larva (Starich <i>et al.</i> , 2001 and Phelan and Starich, 2001) | X   |
| F08G2.5          |                 | Protein of unknown function                      | ND                                                                                                 | II  |
| F09F3.6          |                 | Transthyretin-like                               | ND                                                                                                 | V   |
| F09F7.8          |                 | Protein of unknown function                      | ND                                                                                                 | III |
| F10B5.3          |                 | C2H2 zinc finger                                 | ND                                                                                                 | II  |
| F10F2.9          | <i>pqn-29</i>   | Protein of unknown function                      | ND                                                                                                 | III |
| F10G8.8          |                 | PH domain                                        | Pharynx (YK)                                                                                       | I   |
| F11D5.1          |                 | Protein of unknown function                      | ND                                                                                                 | X   |
| F11E6.8          |                 | Protein kinase                                   | Pharynx (YK)                                                                                       | IV  |
| <b>F11G11.2</b>  | <i>gst-7</i>    | Glutathione S-transferase                        | Pharynx (YK)                                                                                       | II  |
| F12F3.1          | <i>exp-2</i>    | Potassium ion channel                            | Pharynx muscle, intestinal muscle, neurons (Davis <i>et al.</i> , 1999)                            | V   |
| <b>F13H10.1</b>  |                 | Protein of unknown function                      | ND                                                                                                 | IV  |
| F13H8.4          |                 | Protein of unknown function                      | ND                                                                                                 | II  |
| F14B4.1          |                 | LDL receptor-related protein                     | Pharynx (YK)                                                                                       | I   |
| <b>F16B4.8</b>   | <i>cdc-25.2</i> | Phosphatase, rhodanese-like                      | Non-pharyngeal (YK)                                                                                | V   |
| <b>F17A9.4</b>   |                 | NADH oxidase family member                       | ND                                                                                                 | V   |
| <b>F17E9.9</b>   | <i>his-34</i>   | H2B histone                                      | ND                                                                                                 | IV  |
| <b>F18E9.2</b>   | <i>nlp-7</i>    | Neuropeptide-like protein                        | Non-pharyngeal neurons (Nathoo <i>et al.</i> , 2001)                                               | X   |
| F19C6.4          |                 | Nepriylsin (zinc metallopeptidase)               | ND                                                                                                 | X   |
| F19G12.3         |                 | Protein of unknown function, contains PAZ domain | ND                                                                                                 | X   |
| F20B10.3         |                 | Protein of unknown function                      | ND                                                                                                 | IV  |

|                |               |                                            |                                                                                                    |     |
|----------------|---------------|--------------------------------------------|----------------------------------------------------------------------------------------------------|-----|
| F21D5.9        |               | C2H2 zinc finger                           | Pharynx, intestine, and hypodermis (Ao <i>et al.</i> )                                             | IV  |
| F21D9.5        |               | Protein of unknown function                | ND                                                                                                 | V   |
| F21H11.3       | <i>tbx-2</i>  | T-box family member                        | Pharynx (YK)                                                                                       | III |
| F22A3.1        |               | ETS and Pointed domains                    | Pharynx, hypodermis, vulva (YK)                                                                    | X   |
| <b>F22F1.1</b> | <i>hil-3</i>  | Histone H1-like                            | Pharynx, and gonad/germline and maternal (YK)                                                      | X   |
| <b>F22F4.2</b> | <i>inx-3</i>  | Innexin                                    | Ubiquitous in embryo, pharynx in larva (Starich <i>et al.</i> , 2001 and Phelan and Starich, 2001) | X   |
| <b>F23A7.5</b> |               | Protein of unknown function                | ND                                                                                                 | X   |
| F25G6.6        | <i>nrs-2</i>  | Glutamine/Asparagine amidotransferase      | ND                                                                                                 | V   |
| F26A10.2       |               | C2H2 zinc finger                           | Pharynx (YK)                                                                                       | X   |
| F26D10.11      |               | Protein of unknown function                | ND                                                                                                 | IV  |
| F26E4.12       |               | Glutathione peroxidase                     | ND                                                                                                 | I   |
| F26F12.4       |               | Protein of unknown function                | Pharynx (YK)                                                                                       | V   |
| F26G1.6        |               | Nepriysin (zinc metallopeptidase)          | ND                                                                                                 | II  |
| <b>F28B1.3</b> |               | Protein of unknown function                | ND                                                                                                 | V   |
| <b>F28D1.2</b> |               | Protein of unknown function                | ND                                                                                                 | IV  |
| F29F11.5       | <i>ceh-22</i> | NK-2 Homeodomain protein                   | Pharynx muscle (Okkema and Fire, 1994)                                                             | V   |
| <b>F30H5.3</b> |               | Serine inhibitor                           | Pharynx (YK)                                                                                       | III |
| F35A5.3        | <i>abu-10</i> | DUF139 containing protein                  | Pharynx muscle (Ao <i>et al.</i> )                                                                 | X   |
| F35D11.2       | <i>pqn-35</i> | Protein of unknown function                | Pharynx (IH)                                                                                       | II  |
| F35E12.5       |               | DUF141 containing protein                  | ND                                                                                                 | V   |
| F36D4.3        | <i>hum-2</i>  | Unconventional myosin heavy chain, class V | Pharynx (YK)                                                                                       | V   |
| <b>F37B1.2</b> | <i>gst-12</i> | Glutathione S-transferase                  | ND                                                                                                 | II  |
| F38A6.1        | <i>pha-4</i>  | Forkhead box protein, class A              | Pharynx, hindgut, intestine (Horner <i>et al.</i> 1998, Kalb <i>et al.</i> 1998)                   | V   |
| F38B6.1        |               | Protein of unknown function                | ND                                                                                                 | X   |
| F38H4.3        |               | Protein of unknown function                | ND                                                                                                 | IV  |

|                 |               |                                                   |                                                       |     |
|-----------------|---------------|---------------------------------------------------|-------------------------------------------------------|-----|
| <b>F39E9.5</b>  |               | Mariner transposase                               | ND                                                    | II  |
| <b>F39E9.6</b>  |               | Neprilysin (zinc metallopeptidase)                | ND                                                    | II  |
| F39E9.7         |               | Double-stranded RNA binding domain                | ND                                                    | II  |
| F40E10.2        | <i>sox-3</i>  | SRY box family member                             | ND                                                    | X   |
| F40E10.5        |               | DUF148 containing protein                         | ND                                                    | X   |
| F40F9.10        |               | Met-10+ like protein                              | ND                                                    | V   |
| <b>F40G9.5</b>  |               | DUF216 containing protein                         | ND                                                    | III |
| <b>F40G9.6</b>  |               | Protein of unknown function                       | ND                                                    | III |
| <b>F40H3.4</b>  | <i>fkh-8</i>  | Forkhead box protein                              | Non-pharyngeal neurons (Hope <i>et al.</i> 2003)      | II  |
| <b>F40H3.5</b>  | <i>hst-3</i>  | Heparan sulphotransferase                         | ND                                                    | II  |
| F41G3.10        |               | ShTK containing protein                           | ND                                                    | II  |
| <b>F41H10.8</b> | <i>elo-6</i>  | Polyunsaturated fatty acid elongase               | Pharynx (YK)                                          | IV  |
| F42G2.3         |               | Protein of unknown function                       | ND                                                    | II  |
| <b>F42G9.9</b>  | <i>ptl-1</i>  | Tubulin-binding Tau protein                       | Non-pharyngeal neurons (Goedert <i>et al.</i> , 1996) | III |
| <b>F43G9.11</b> | <i>ces-1</i>  | C2H2 zinc finger                                  | ND                                                    | I   |
| F43H9.2         |               | Aminotransferase                                  | ND                                                    | V   |
| <b>F44A2.5</b>  |               | Initiation factor eIF-4 gamma, middle domain      | Pharynx (IH)                                          | V   |
| <b>F44E7.2</b>  |               | Protein of unknown function                       | ND                                                    | V   |
| <b>F45F2.2</b>  | <i>his-39</i> | Histone 2B                                        | ND                                                    | V   |
| <b>F45G2.2</b>  |               | Myosin head (motor domain)                        | Pharynx muscle (JG, unpub obs)                        | III |
| <b>F45H11.1</b> |               | C2H2 zinc finger protein                          | ND                                                    | I   |
| <b>F46F3.1</b>  | <i>ceh-27</i> | Homeobox domain                                   | Anterior/head of embryo (Harfe and Fire via WormBase) | V   |
| <b>F47F6.2</b>  | <i>lin-42</i> | PAS and PAC domains, required for L4/adult switch | Hypodermis (Jeon <i>et al.</i> 1999)                  | II  |
| <b>F48C5.1</b>  |               | Immunoglobulin superfamily member                 | Pharynx (YK)                                          | X   |
| <b>F48E3.8</b>  |               | EGF-containing protein                            | Pharynx (YK)                                          | X   |
| F49D11.8        | <i>cpn-4</i>  | Calponin                                          | ND                                                    | I   |
| <b>F49E10.2</b> |               | Retinal pigment epithelial membrane protein       | Pharynx (YK)                                          | X   |
| F52B11.5        |               | Protein of unknown function                       | ND                                                    | IV  |
| F53A9.3         |               | Protein of unknown function                       | ND                                                    | X   |
| <b>F53B3.3</b>  |               | Protein of unknown function                       | Pharynx (IH)                                          | X   |
| <b>F53H4.5</b>  |               | SAND domain                                       | Pharynx (IH)                                          | X   |
| <b>F54E2.2</b>  |               | Contains whey acidic protein, core region         | Pharynx (YK)                                          | V   |
| <b>F54E2.3</b>  | <i>pqn-43</i> | Immunoglobulin-like                               | Pharynx (YK)                                          | V   |

|                 |               |                                                                              |                                                                                                |     |
|-----------------|---------------|------------------------------------------------------------------------------|------------------------------------------------------------------------------------------------|-----|
| F54F3.1         | <i>nid-1</i>  | Nidogen                                                                      | Body wall muscle, neurons, pharynx and intestine (Kang and Kramer, 2000)                       | V   |
| <b>F54H12.3</b> |               | Contains integrase core domain                                               | ND                                                                                             | III |
| <b>F56A12.1</b> | <i>ceh-35</i> | Homeobox protein, six/sine oculis class                                      | ND                                                                                             | V   |
| <b>F56D12.4</b> | <i>jip-1</i>  | SH3 and Phosphotyrosine interaction domains                                  | ND                                                                                             | II  |
| <b>F56D2.3</b>  |               | Protein of unknown function                                                  | Pharynx (YK)                                                                                   | III |
| <b>F56H9.2</b>  |               | Protein of unknown function                                                  | ND                                                                                             | V   |
| F57B1.6         |               | Protein of unknown function                                                  | ND                                                                                             | V   |
| F58G4.1         |               | Myosin                                                                       | Pharynx (YK)                                                                                   | V   |
| <b>F59B10.3</b> |               | Cadherin transmembranous domain                                              | ND                                                                                             | II  |
| F59C12.1        | <i>cdh-9</i>  | Cadherin                                                                     | Pharynx (R. Babbar and J. Pettit, pers comm.)                                                  | X   |
| H30A04.1        | <i>eat-20</i> | EGF-like, paralog of crumbs/crb-1                                            | Pharynx muscle and non-pharyngeal neurons (Shibata <i>et al.</i> , 2000)                       | X   |
| <b>K01C8.2</b>  |               | Contains worm specific repeat type I                                         | ND                                                                                             | II  |
| K01D12.11       |               | Glutathione S-transferase                                                    | ND                                                                                             | V   |
| <b>K02E10.2</b> | <i>hid-1</i>  | Member of High temperature-induced Dauer formation gene class, novel protein | Non-pharyngeal neurons and pharynx (IH)                                                        | X   |
| K04G11.2        |               | Protein of unknown function                                                  | ND                                                                                             | X   |
| K04G11.6        |               | Protein of unknown function                                                  | ND                                                                                             | X   |
| <b>K04H4.2</b>  |               | Chitin-binding motifs                                                        | Pharynx (YK)                                                                                   | III |
| K06A1.3         |               | Protein of unknown function                                                  | Pharynx (YK)                                                                                   | II  |
| <b>K07C11.1</b> | <i>pax-1</i>  | Paired box transcription factor                                              | Pharyngeal marginal cells (Stevenson <i>et al.</i> , in prep)                                  | V   |
| K07C11.4        |               | Esterase                                                                     | Pharynx muscle and marginal cells, intestine, hindgut, and proximal somatic gonad (this paper) | V   |
| K07D4.6         |               | Protein of unknown function                                                  | ND                                                                                             | II  |

|                 |               |                                                         |                                                  |     |
|-----------------|---------------|---------------------------------------------------------|--------------------------------------------------|-----|
| K08A8.2         | <i>sox-2</i>  | SRY box family member                                   | ND                                               | X   |
| K08D9.4         |               | Esterase                                                | ND                                               | V   |
| K08F4.11        | <i>gst-3</i>  | Glutathione S-transferase                               | ND                                               | IV  |
| K08F4.7         | <i>gst-4</i>  | Glutathione S-transferase                               | ND                                               | IV  |
| K08F8.2         |               | Basic-leucine zipper transcription factor               | Pharynx (YK)                                     | II  |
| <b>K09B11.3</b> |               | Protein of unknown function                             | ND                                               | IV  |
| <b>K09F6.9</b>  |               | Contains M protein repeat                               | ND                                               | II  |
| K10D11.1        |               | DUF141 containing protein                               | ND                                               | IV  |
| K10D3.4         |               | Kunitz/Bovine pancreatic trypsin inhibitor              | Pharynx (YK)                                     | I   |
| <b>K10H10.3</b> | <i>dhs-8</i>  | Alcohol/short chain dehydrogenase                       | ND                                               | II  |
| K11C4.2         |               | Hly-III related protein (integral membrane protein)     | ND                                               | V   |
| <b>K11G9.4</b>  | <i>egl-46</i> | C2H2 zinc finger protein                                | Non-pharyngeal neurons (Wu <i>et al.</i> , 2001) | V   |
| K11H12.5        |               | Protein of unknown function                             | ND                                               | IV  |
| M01D1.2         |               | Contains MATH domain                                    | ND                                               | II  |
| <b>M02A10.3</b> | <i>sli-1</i>  | Cbl proto-oncogene homolog                              | Non-pharyngeal (YK)                              | X   |
| M02G9.1         |               | DUF139 containing protein; keratin like                 | ND                                               | II  |
| M03D4.4         |               | C2H2 zinc finger protein                                | Pharynx muscle (Ao <i>et al.</i> )               | IV  |
| M05B5.2         |               | Protein of unknown function                             | Pharynx (Gaudet and Mango, 2002)                 | I   |
| <b>M153.3</b>   |               | ShTK containing protein                                 | ND                                               | X   |
| M162.2          |               | C-type lectin                                           | ND                                               | V   |
| M195.2          |               | C-type lectin                                           | ND                                               | II  |
| M88.4           |               | Contains phosphotyrosine interaction domain             | Pharynx (YK)                                     | III |
| R02F11.1        |               | Protein of unknown function                             | Pharynx (YK)                                     | V   |
| R03C1.1         |               | Protein of unknown function                             | ND                                               | II  |
| R03D7.6         | <i>gst-5</i>  | Glutathione S-transferase                               | ND                                               | II  |
| <b>R04E5.7</b>  |               | Protein of unknown function                             | Body muscle or hyp? (YK)                         | X   |
| R06F6.9         |               | Acyl CoA binding protein, Enoyl-CoA hydratase/isomerase | Pharynx (YK)                                     | II  |
| R07B1.10        | <i>lec-8</i>  | Galectin                                                | Pharynx (YK)                                     | X   |
| R07B1.9         |               | Protein of unknown function                             | Pharynx muscle (this paper; Ao <i>et al.</i> )   | X   |
| R07C3.5         |               | Protein of unknown function                             | ND                                               | II  |
| R07E3.2         |               | Protein of unknown function                             | ND                                               | X   |



|                 |               |                                                               |                                                          |     |
|-----------------|---------------|---------------------------------------------------------------|----------------------------------------------------------|-----|
| R07H5.4         |               | Protein of unknown function                                   | ND                                                       | IV  |
| R08F11.3        |               | Cytochrome P450                                               | ND                                                       | V   |
| R09B5.5         | <i>pqn-54</i> | DUF139 containing protein                                     | ND                                                       | V   |
| R09E10.5        |               | AMOP and nidogen extracellular region domains                 | ND                                                       | IV  |
| R09F10.2        | <i>abu-9</i>  | DUF139 containing protein                                     | ND                                                       | X   |
| R09F10.7        | <i>pqn-57</i> | DUF139 containing protein                                     | ND                                                       | X   |
| R102.2          |               | Protein of unknown function                                   | ND                                                       | IV  |
| R107.7          | <i>gst-1</i>  | Glutathione S-transferase                                     | ND                                                       | III |
| R11G1.6         |               | Protein kinase C, phorbol ester/diacylglycerol binding domain | Pharynx (YK)                                             | X   |
| R11G11.7        | <i>pqn-60</i> | DUF148 containing protein                                     | ND                                                       | V   |
| <b>R12A1.3</b>  |               | Kunitz/Bovine pancreatic trypsin inhibitor                    | ND                                                       | V   |
| <b>R12H7.3</b>  | <i>skr-19</i> | Skp1 homolog                                                  | Pharynx (YK)                                             | X   |
| <b>T01B11.2</b> |               | Aminotransferase, class III                                   | ND                                                       | IV  |
| T01B7.8         |               | 4Fe-4S ferredoxin, alpha defensin                             | ND                                                       | II  |
| T01D1.6         | <i>abu-11</i> | DUF139 containing protein                                     | ND                                                       | II  |
| T03D8.4         | <i>grl-14</i> | Ground-like, DUF398 containing                                | ND                                                       | V   |
| T03F1.11        |               | Protein of unknown function                                   | Pharynx (YK)                                             | I   |
| <b>T03G11.8</b> | <i>zig-6</i>  | Immunoglobulin-like                                           | Body muscle (Aurelio <i>et al.</i> , 2002)               | X   |
| <b>T04B8.2</b>  |               | Cyclin-like F-box                                             | ND                                                       | II  |
| T04C9.4         | <i>mlp-1</i>  | LIM domain                                                    | Pharynx (YK)                                             | III |
| T04C9.6         | <i>frm-2</i>  | FERM domain (protein 4.1 family)                              | Pharynx (YK)                                             | III |
| T04H1.6         | <i>lrx-1</i>  | Low-density lipoprotein receptor domain, class A              | ND                                                       | V   |
| <b>T05A6.1</b>  | <i>cki-1</i>  | Cyclin-dependent kinase inhibitor                             | Neurons, hypodermis, pharynx (Hong <i>et al.</i> , 1998) | II  |
| <b>T05A7.4</b>  | <i>hmg-11</i> | HMG-I/HMG-Y DNA-binding domain (A+T hook)                     | Vulva and broad early embryo (YK)                        | II  |
| T05B4.11        |               | ShTK containing protein                                       | Pharynx (YK)                                             | V   |
| T05B4.12        |               | ShTK containing protein                                       | ND                                                       | V   |
| T05B4.13        |               | ShTK containing protein                                       | ND                                                       | V   |
| T05B4.3         |               | ShTK containing protein                                       | Pharynx (YK)                                             | V   |
| T05B4.8         |               | ShTK containing protein                                       | ND                                                       | V   |
| T05C12.4        |               | Protein of unknown function                                   | ND                                                       | II  |
| T05E11.3        |               | Endoplasmic precursor (GRP94); Hsp90 protein                  | Pharynx, hindgut, intestine (Gaudet and Mango, 2002; YK) | IV  |

|                 |               |                                               |                                                                  |     |
|-----------------|---------------|-----------------------------------------------|------------------------------------------------------------------|-----|
| T06D8.3         |               | PAP2-related phosphatase/phosphoesterase      | Pharynx (YK)                                                     | II  |
| T06E4.11        | <i>pqn-63</i> | Protein of unknown function                   | ND                                                               | V   |
| T06E4.7         |               | Nematode 7TM chemoreceptor                    | Pharynx (YK)                                                     | V   |
| T06E4.8         |               | Protein of unknown function                   | Pharynx (YK)                                                     | V   |
| T06E4.9         |               | Protein of unknown function                   | ND                                                               | V   |
| T08B1.2         | <i>tnt-4</i>  | Troponin T                                    | (Bucher lab via WormBase)                                        | V   |
| T08E11.7        |               | Cyclin-like F-box                             | ND                                                               | II  |
| <b>T08G3.10</b> | <i>srw-35</i> | Serpentine receptor, class W                  | ND                                                               | V   |
| <b>T09B4.5</b>  |               | Protein of unknown function                   | Broad but pharynx-enriched (YK)                                  | I   |
| <b>T09B4.6</b>  |               | Ser/Thr protein kinase                        | ND                                                               | I   |
| T10E10.4        |               | Chitin-binding domain                         | Broad but pharynx-enriched (YK)                                  | X   |
| T11B7.4         | <i>eat-1</i>  | LIM domain, homolog of ALP/Enigma             | Pharynx muscle and body muscle (McKeown and Beckerle, pers comm) | IV  |
| T11F9.12        |               | Protein of unknown function                   | Pharynx muscle (unpub obs)                                       | V   |
| T12B5.8         |               | Cyclin-like F-box                             | ND                                                               | III |
| <b>T14E8.3</b>  |               | 7 transmembrane receptor                      | ND                                                               | X   |
| T14F9.4         | <i>peb-1</i>  | FLYWCH zinc finger                            | Pharynx, hindgut and vulva (Thatcher <i>et al.</i> , 2001)       | X   |
| T14G10.4        |               | Transthyretin-like                            | ND                                                               | IV  |
| <b>T14G12.4</b> | <i>fkf-2</i>  | Fork head box, sloppy-paired homolog          | AB and D descendants (Hope <i>et al.</i> , 2003)                 | X   |
| T15H9.3         | <i>hlh-6</i>  | Helix-loop-helix DNA-binding domain           | ND                                                               | II  |
| <b>T16A1.9</b>  |               | RNA-directed DNA polymerase                   | ND                                                               | II  |
| T16G1.1         | <i>pqn-67</i> | Contains worm-specific repeat type 1          | ND                                                               | V   |
| T17H7.4d        | <i>gei-16</i> | Mpv17/PMP22 domain, involved in morphogenesis | ND                                                               | III |
| T18D3.4         | <i>myo-2</i>  | Myosin heavy chain, structural class          | Pharynx muscle (Okkema <i>et al.</i> , 1993)                     | X   |
| T20B3.2         | <i>tnt-3</i>  | Troponin I                                    | Body muscle (H. Kagawa, pers comm.)                              | V   |

|                   |               |                                                                |                                                                                                                                                               |     |
|-------------------|---------------|----------------------------------------------------------------|---------------------------------------------------------------------------------------------------------------------------------------------------------------|-----|
| T20G5.7           |               | ShTK containing protein                                        | Pharynx (YK)                                                                                                                                                  | III |
| <b>T22A3.8</b>    | <i>lam-3</i>  | Laminin related                                                | Broad embryonic, but enriched in late embryo pharynx (YK)                                                                                                     | I   |
| T22B11.4          |               | Protein of unknown function                                    | ND                                                                                                                                                            | IV  |
| <b>T22C8.3</b>    |               | C2H2 zinc finger                                               | ND                                                                                                                                                            | II  |
| T23D8.8           | <i>cfi-1</i>  | ARID/BRIGHT DNA binding domain                                 | Non-pharyngeal neurons, head cells, and pharynx muscle (Shaham and Bargmann, 2002)                                                                            | I   |
| T23F1.6           | <i>pqn-71</i> | DUF139 containing protein                                      | ND                                                                                                                                                            | V   |
| T23G5.3           |               | P21-Rho-binding domain                                         | ND                                                                                                                                                            | III |
| <b>T24B8.6</b>    | <i>hlh-3</i>  | Helix-loop-helix domain                                        | ND                                                                                                                                                            | II  |
| T25E4.1           |               | Protein of unknown function                                    | Pharynx (YK)                                                                                                                                                  | II  |
| <b>T25G12.8</b>   |               | CCHC zinc finger                                               | ND                                                                                                                                                            | X   |
| T26C5.1           | <i>gst-13</i> | Glutathione S-transferase                                      | ND                                                                                                                                                            | II  |
| <b>T27A1.2</b>    |               | Protein of unknown function                                    | ND                                                                                                                                                            | II  |
| T27C5.10          |               | Protein of unknown function                                    | ND                                                                                                                                                            | V   |
| T28B4.4           |               | Claudin homolog, possible role in cohesion of apical junctions | ND                                                                                                                                                            | X   |
| <b>T28B8.1</b>    |               | Protein of unknown function                                    | Pharynx (YK)                                                                                                                                                  | I   |
| T28C12.6          |               | Contains whey acidic protein, core region                      | ND                                                                                                                                                            | V   |
| <b>VF13D12L.1</b> |               | myo-inositol-1-phosphate synthase                              | ND                                                                                                                                                            | II  |
| W01C9.1           |               | Protein of unknown function                                    | ND                                                                                                                                                            | II  |
| W01C9.3           | <i>pqn-73</i> | Contains BRICHOS domain                                        | Pharynx (YK)                                                                                                                                                  | II  |
| <b>W03F8.10</b>   |               | Protein of unknown function                                    | ND                                                                                                                                                            | IV  |
| W03F8.6           |               | Protein of unknown function                                    | Pharynx (IH)                                                                                                                                                  | IV  |
| W04B5.1           |               | Protein of unknown function                                    | Intestine and weak pharynx (YK)                                                                                                                               | III |
| <b>W04H10.2</b>   |               | Protein of unknown function                                    | ND                                                                                                                                                            | II  |
| W05E10.3          | <i>ceh-32</i> | Homeodomain protein, related to Six3/6 subfamily               | Anterior embryo (neurons, hypodermis, and pharynx; Dozier <i>et al.</i> , 2001; C. Dozier, G. Cassata, G. Niklaus, H. Kagoshima, and T. Burglin, pers. comm.) | V   |

|                   |               |                                                        |                                                                  |     |
|-------------------|---------------|--------------------------------------------------------|------------------------------------------------------------------|-----|
| W06D12.3          | <i>fat-5</i>  | Fatty acid desaturase                                  | Pharynx (YK)                                                     | V   |
| <b>W06F12.2</b>   |               | Protein of unknown function                            | Pharynx (YK)                                                     | III |
| W06F12.3          |               | Serine/threonine kinase                                | Pharynx (YK)                                                     | III |
| <b>W08E12.3</b>   |               | 2Fe-2S ferredoxin                                      | Late embryonic pharynx (YK)                                      | IV  |
| <b>W08E12.5</b>   |               | 2Fe-2S ferredoxin                                      | ND                                                               | IV  |
| W10D9.1           |               | Protein of unknown function                            | ND                                                               | I   |
| <b>Y106G6H.13</b> |               | Protein of unknown function                            | ND                                                               | I   |
| <b>Y37E11AR.6</b> | <i>vab-2</i>  | Ephrin ligand                                          | Non-pharyngeal neurons, pharynx (Chin Sang <i>et al.</i> , 1999) | IV  |
| Y38H6C.14         |               | Protein of unknown function                            | ND                                                               | V   |
| <b>Y39G8C.4</b>   | <i>col-87</i> | Cuticular collagen                                     | ND                                                               | II  |
| <b>Y40B1B.3</b>   |               | Cyclin-like F-box                                      | ND                                                               | I   |
| <b>Y45G12C.2</b>  | <i>gst-10</i> | Glutathione S-transferase                              | ND                                                               | V   |
| <b>Y45G12C.3</b>  |               | Glutathione S-transferase                              | ND                                                               | V   |
| <b>Y46G5A.7</b>   |               | Cyclin-like F-box                                      | ND                                                               | II  |
| <b>Y47D3A.1</b>   |               | Protein of unknown function                            | ND                                                               | III |
| <b>Y47D3A.20</b>  |               | Protein of unknown function                            | ND                                                               | III |
| <b>Y48E1B.11</b>  |               | Protein of unknown function                            | ND                                                               | II  |
| <b>Y49F6C.2</b>   |               | Protein of unknown function                            | ND                                                               | II  |
| <b>Y49F6C.3</b>   |               | MATH and BTB/POZ domains                               | ND                                                               | II  |
| <b>Y50E8A.5</b>   |               | Gonadotropin, beta chain domain                        | ND                                                               | V   |
| Y51A2D.11         |               | Transthyretin-like                                     | ND                                                               | V   |
| <b>Y53F4B.7</b>   |               | Protein of unknown function                            | ND                                                               | II  |
| <b>Y54E2A.10</b>  |               | Protein of unknown function                            | ND                                                               | II  |
| <b>Y54E5A.1</b>   |               | Fatty acid desaturase                                  | ND                                                               | II  |
| <b>Y66H1A.1</b>   |               | Protein of unknown function                            | ND                                                               | IV  |
| Y73F4A.1          |               | DOMON domain (possible role in extracellular adhesion) | ND                                                               | IV  |
| Y73F4A.2          |               | DOMON domain (possible role in extracellular adhesion) | ND                                                               | IV  |
| Y76A2B.2          |               | Leucine rich repeat                                    | ND                                                               | III |
| <b>Y9D1A.1</b>    |               | Protein of unknown function                            | Pharynx (YK)                                                     | II  |
| ZC101.1           |               | Low density lipoprotein-receptor, class A              | ND                                                               | II  |
| <b>ZC116.3</b>    |               | EGF-like and CUB domains; BMP-1 like                   | Neuronal? (YK)                                                   | V   |
| <b>ZC132.6</b>    |               | Peptidase family A16, CCHC zinc finger                 | ND                                                               | V   |
| ZC250.1           | <i>cyp-17</i> | Cyclophilin type peptidyl-prolyl cis-trans isomerase   | ND                                                               | V   |
| ZC443.2           |               | Protein of unknown function                            | ND                                                               | V   |
| <b>ZC8.3</b>      |               | MYND type zinc finger                                  | Broad but                                                        | X   |

|                |               |                                                  |                                                                         |     |
|----------------|---------------|--------------------------------------------------|-------------------------------------------------------------------------|-----|
|                |               |                                                  | pharynx-enriched (YK)                                                   |     |
| <b>ZK84.3</b>  |               | Protein of unknown function                      | Non-pharyngeal neurons (IH)                                             | III |
| ZK1025.7       |               | DUF23 containing protein                         | ND                                                                      | I   |
| ZK1067.7       | <i>pqn-95</i> | DUF139 containing protein                        | Pharynx muscle and marginal cells (Ao <i>et al.</i> )                   | II  |
| <b>ZK287.1</b> |               | Protein of unknown function                      | Ubiquitous or very broad in embryos (YK)                                | V   |
| ZK418.3        |               | Protein of unknown function                      | ND                                                                      | III |
| ZK662.2        |               | Protein of unknown function                      | Pharynx (YK)                                                            | X   |
| ZK673.7        | <i>tnc-2</i>  | Troponin C                                       | Pharynx muscle (Terami and Kagawa, pers comm)                           | II  |
| <b>ZK682.5</b> |               | Leucine rich repeat                              | Intestine (JG, unpub obs)                                               | V   |
| <b>ZK75.2</b>  | <i>ins-2</i>  | Insulin-related                                  | Non-pharyngeal neurons, pharynx and vulva (Pierce <i>et al.</i> , 2001) | II  |
| <b>ZK792.7</b> |               | Ser/Thr protein phosphatase                      | ND                                                                      | IV  |
| <b>ZK816.3</b> |               | Protein of unknown function                      | ND                                                                      | X   |
| ZK816.4        |               | Protein of unknown function                      | Pharynx (Gaudet and Mango, 2002)                                        | X   |
| ZK892.7        |               | C2H2 zinc finger                                 | ND                                                                      | II  |
| <b>ZK909.4</b> | <i>ces-2</i>  | Basic leucine zipper (bZIP) transcription factor | Broad but pharynx-enriched (YK)                                         | I   |

**Supplemental Table 1.** The 339 microarray positives. Genes in bold are new positives that are not part of the set from Gaudet and Mango, 2002. Genes in green are expressed in the pharynx, while those in red are non-pharyngeal. Descriptions of predicted products are summarized from entries in WormBase, version 110. Expression data is as described by others, by our GFP reporters, or from our interpretations of data from the Kohara lab Nematode Expression Pattern Database (NEXTDB).
