# Supplementary material for: Whole-Genome Analysis of Temporal Gene Expression during Foregut Development
Source: PubMed Central journal article supplement (PMC523228; doi:10.1371/journal.pbio.0020352), 2004-10-19
Supplement: pbio.0020352.st002.pdf [file pbio.0020352.st002.pdf]

| Gene     | Gene Name     | Protein Class       |
|----------|---------------|---------------------|
| B0507.1  |               | Other               |
| C10G8.5  | <i>ncx-2</i>  | Channel/Receptor    |
| C14B9.2  |               | Enzyme              |
| C14C11.8 | <i>pqn-13</i> | DUF139              |
| C44H4.1  |               | Other               |
| C46H11.9 |               | ShTK                |
| F08B12.1 |               | Other               |
| F10G8.8  |               | Other               |
| F11E6.8  |               | Kinase/Phosphatase  |
| F14B4.1  |               | Other               |
| F21H11.3 | <i>tbx-2</i>  | Trxn Factor         |
| F26A10.2 |               | Trxn Factor         |
| F26F12.4 |               | Unknown             |
| F29F11.5 | <i>ceh-22</i> | Trxn Factor         |
| F30H5.3  |               | Protease Inhibitor  |
| F36D4.3  | <i>hum-2</i>  | Cytoskeletal/Muscle |
| F38A6.1  | <i>pha-4</i>  | Trxn Factor         |
| F41H10.8 | <i>elo-6</i>  | Enzyme              |
| F48E3.8  |               | Other               |
| F49E10.2 |               | Other               |
| F54E2.2  |               | Other               |
| K04H4.2  |               | ECM                 |
| K07C11.1 | <i>pax-1</i>  | Trxn Factor         |
| K07C11.4 |               | Enzyme              |
| K08F8.2  |               | Trxn Factor         |
| K10D3.4  |               | Protease Inhibitor  |
| M03D4.4  |               | Trxn Factor         |
| M05B5.2  |               | Unknown             |
| R02F11.1 |               | Unknown             |
| R07B1.10 | <i>lec-8</i>  | Other               |
| T04C9.6  | <i>frm-2</i>  | Cytoskeletal/Muscle |
| T05E11.3 |               | Other               |
| T06D8.3  |               | Kinase/Phosphatase  |
| T20G5.7  |               | ShTK                |
| W01C9.3  | <i>pqn-73</i> | Other               |
| W06F12.2 |               | Unknown             |
| Y9D1A.1  |               | Unknown             |

**Supplemental Table 2A.** List of 37 Ph-E genes. These ‘Early’ pharyngeal genes are all expressed at or before the formation of the pharynx primordium, in the bean to comma stage of embryogenesis. ‘Protein Class’ is as defined in Figure 2.

| Gene     | Gene Name     | Protein Class       |
|----------|---------------|---------------------|
| C03A7.7  | <i>abu-6</i>  | DUF139              |
| C23H3.9  |               | Enzyme              |
| C49G7.4  |               | ShTK                |
| D1054.9  |               | Unknown             |
| E01G6.1  |               | Protease Inhibitor  |
| F08B12.4 |               | Unknown             |
| F12F3.1  | <i>exp-2</i>  | Channel/Receptor    |
| F22A3.1  |               | Trxn Factor         |
| F44A2.5  |               | Other               |
| F45G2.2  |               | Cytoskeletal/Muscle |
| F48C5.1  |               | Other               |
| F53B3.3  |               | Unknown             |
| F53H4.5  |               | Trxn Factor         |
| F54E2.3  | <i>pqn-43</i> | Other               |
| F58G4.1  |               | Cytoskeletal/Muscle |
| H30A04.1 | <i>eat-20</i> | Other               |
| K06A1.3  |               | ECM                 |
| M88.4    |               | Other               |
| R07B1.9  |               | Unknown             |
| R11G1.6  |               | Kinase/Phosphatase  |
| T03F1.11 |               | Unknown             |
| T04C9.4  | <i>mlp-1</i>  | Cytoskeletal/Muscle |
| T05B4.11 |               | ShTK                |
| T05B4.3  |               | ShTK                |
| T06E4.7  |               | Channel/Receptor    |
| T06E4.8  |               | Unknown             |
| T11B7.4  | <i>eat-1</i>  | Cytoskeletal/Muscle |
| T11F9.12 |               | Unknown             |
| T18D3.4  | <i>myo-2</i>  | Cytoskeletal/Muscle |
| T25E4.1  |               | Unknown             |
| W06D12.3 | <i>fat-5</i>  | Enzyme              |
| ZK1067.7 | <i>pqn-95</i> | DUF139              |
| ZK662.2  |               | Unknown             |
| ZK673.7  | <i>tnc-2</i>  | Cytoskeletal/Muscle |

**Supplemental Table 2B.** List of 34 Ph-L genes. These ‘Late’ pharyngeal genes are all expressed when the pharynx is almost completely developed or later, from the 3-fold stage of embryogenesis and on. ‘Protein Class’ is as defined in Figure 2.
