# Supplementary material for: Whole-Genome Analysis of Temporal Gene Expression during Foregut Development
Source: PubMed Central journal article supplement (PMC523228; doi:10.1371/journal.pbio.0020352), 2004-10-19
Supplement: pbio.0020352.st003.pdf [file pbio.0020352.st003.pdf]

**Table 3A.**

| GENE     | 501-1000   | 1-500       |
|----------|------------|-------------|
| B0507.1  | ND*        | ND*         |
| C10G8.5A | ✓          | ✓           |
| C14B9.2  | ND*        | ✓           |
| C14C11.8 | ✓          | ✓           |
| C44H4.1  | -          | ✓           |
| C46H11.9 | -          | -           |
| F08B12.1 | -          | ✓           |
| F10G8.8  | -          | ✓           |
| F11E6.8  | -          | ✓           |
| F14B4.1  | -          | -           |
| F21H11.3 | -          | ✓           |
| F26A10.2 | ✓          | ✓           |
| F26F12.4 | ✓          | ✓           |
| F29F11.5 | ✓          | ✓           |
| F30H5.3  | -          | -           |
| F36D4.3B | -          | ✓           |
| F38A6.1  | -          | -           |
| F41H10.8 | -          | -           |
| F48E3.8A | -          | -           |
| F49E10.2 | ✓          | ✓           |
| F54E2.2  | ND*        | ND*         |
| K04H4.2  | ✓          | ✓           |
| K07C11.1 | -          | -           |
| K07C11.4 | -          | ✓           |
| K08F8.2  | ✓          | -           |
| K10D3.4  | NA*        | NA*         |
| M03D4.4  | -          | ✓           |
| M05B5.2  | -          | ✓           |
| R02F11.1 | -          | ✓           |
| R07B1.10 | -          | ✓           |
| T04C9.6  | -          | ✓           |
| T05E11.3 | ND*        | ND*         |
| T06D8.3  | -          | ✓           |
| T20G5.7  | -          | -           |
| W01C9.3  | -          | ✓           |
| W06F12.2 | -          | -           |
| Y9D1A.1  | NA*        | NA*         |
| Total:   | 8/31 = 26% | 23/32 = 72% |

**Table 3B.**

| GENE     | 501-1000   | 1-500       |
|----------|------------|-------------|
| C03A7.7  | -          | -           |
| C23H3.9a | -          | ✓           |
| C49G7.4  | -          | -           |
| D1054.9A | -          | ✓           |
| E01G6.1  | ✓          | ✓           |
| F08B12.4 | -          | ✓           |
| F12F3.1  | ✓          | ✓           |
| F22A3.1  | -          | ✓           |
| F44A2.5A | -          | -           |
| F45G2.2  | -          | -           |
| F48C5.1  | -          | -           |
| F53B3.3  | -          | ✓           |
| F53H4.5  | ✓          | -           |
| F54E2.3A | -          | -           |
| F58G4.1  | -          | -           |
| H30A04.1 | ✓          | ✓           |
| K06A1.3  | -          | ✓           |
| M88.4    | -          | ✓           |
| R07B1.9  | -          | ✓           |
| R11G1.4A | -          | ✓           |
| T03F1.11 | -          | ✓           |
| T04C9.4A | -          | -           |
| T05B4.11 | -          | -           |
| T05B4.3  | -          | -           |
| T06E4.7  | -          | -           |
| T06E4.8  | -          | ✓           |
| T11B7.4  | -          | -           |
| T11F9.12 | -          | ✓           |
| T18D3.4  | ND*        | ND*         |
| T25E4.1  | -          | ✓           |
| W06D12.3 | -          | ✓           |
| ZK1067.7 | NA*        | NA*         |
| ZK662.2  | ✓          | ✓           |
| ZK673.7  | -          | ✓           |
| Total:   | 5/32 = 16% | 19/32 = 59% |

**Supplemental Table 3.** Conservation of non-coding sequences in (A) Ph-E and (B) Ph-L genes. For all entries, a checkmark indicates the presence of 75% identity across at least 50 continuous base pairs, assayed using the VISTA alignment and plot program. '501-1000' and '1-500' are the regions 501 to 1000 bp and 1 to 500 bp upstream of the predicted ATG, respectively. \*NA = for some genes, sequence of *C. briggsae* orthologs could not be found. \*ND = genes with upstream

neighbors < 1kb away; in these cases conservation of sequence could represent sequences associated with the neighboring gene and were ignored for this analysis.
