# Supplementary material for: Whole-Genome Analysis of Temporal Gene Expression during Foregut Development
Source: PubMed Central journal article supplement (PMC523228; doi:10.1371/journal.pbio.0020352), 2004-10-19
Supplement: pbio.0020352.st004.pdf [file pbio.0020352.st004.pdf]

| Gene      | Temporal Element                                 | PHA-4 Sites                                                |
|-----------|--------------------------------------------------|------------------------------------------------------------|
| B0507.1   | E1 (-131), E2 (-102)                             | TGTTGAC (high, -138)                                       |
| C10G8.5c  | -                                                | TGTTTAC (high, -415)                                       |
| C14B9.2   | -                                                | TGTTTGT (med, -191)                                        |
| C14C11.8  | E1var (-406), E2 (-340)                          | TATTTGC (unk, -310)                                        |
| C44H4.1   | -                                                | TATTTAC, TGTTTAT (unk, -179 , low, -122)                   |
| C46H11.9  | E1var (-73)                                      | TGTTTGT (med, -137)                                        |
| F08B12.1  | E2 (-190, -285)                                  | TGTTGAT (unk, -85)                                         |
| F10G8.8   | -                                                | TATTGAC (unk, -57)                                         |
| F11E6.8   | E1 (-320), E2 (-304)                             | TATTTGC (unk, -84)                                         |
| F14B4.1   | no upstream alignment available                  |                                                            |
| F21H11.3  | L2(-268)                                         | TATTTGT (low, -432)                                        |
| F26A10.2  | E2 (-231)                                        | TGTTGAT (unk, -319)                                        |
| F26F12.4  | E1 (-161), E2 (-133, -321), L1 (-135), L2 (-265) | TATTGAC (unk, -345)                                        |
| F29F11.5  | -                                                | TATTTGT (low, -355)                                        |
| F30H5.3   | E1var (-476)                                     | TGTTTAC (high, -346)                                       |
| F36D4.3c  | -                                                | TGTTGAC (high, -309)                                       |
| F38A6.1   | E1 (-88, -163), L1 (-159)                        | TGTTGAT, TATTGGC (unk, -115, unk, -63)                     |
| F41H10.8  | E1 (-234), E2 (-464), L1 (-78)                   | TGTTTGC (high, -160)                                       |
| F48E3.8   | E1 (-94, -369)                                   | TGTTGGT, TGTTGGT, TGTTTAT (unk, -62, unk, -145, unk, -361) |
| F49E10.2a | E1var (-162, -408)                               | TGTTTGC (high, -433)                                       |
| F54E2.2   | E1var (-67, -102)                                | TGTTTGT (med, -83)                                         |
| K04H4.2a  | E1 (-137, -237, -271), L1 (-332)                 | None                                                       |
| K07C11.1  | E1var (-87)                                      | TGTTTGC (high, -120)                                       |
| K07C11.4  | E1 (-61, -73), E2 (-50, -60, -177)               | TGTTTGC (high, -151)                                       |
| K08F8.2   | E1 (-258), E2 (-86, -458)                        | TATTTGT (low, -234)                                        |
| K10D3.4   | no upstream alignment available                  |                                                            |
| M03D4.4   | E1 (-334, -408), L1 (-442)                       | TGTTTGC (high, -488)                                       |
| M05B5.2   | -                                                | TGTTGAC (high, -243)                                       |
| R02F11.1  | E2 (-239)                                        | TGTTTGT (med, -412)                                        |
| R07B1.10  | -                                                | TATTGAT, TGTTGAT (unk, -441, unk, -468)                    |
| T04C9.6   | -                                                | TGTTGAT (unk, -88)                                         |
| T05E11.3  | E1var (-75, -338, -403)                          | TGTTTGC (high, -80)                                        |
| T06D8.3   | E1 (-354, -421)                                  | TGTTTAC (high, -443)                                       |
| T20G5.7   | no upstream alignment available                  |                                                            |
| W01C9.3   | L2 (-403)                                        | None                                                       |
| W06F12.2a | E1 (-368)                                        | TGTTTGT (med, -165)                                        |
| Y9D1A.1   | no ortholog found                                |                                                            |

**Supplemental Table 4A.** Occurrence of conserved temporal elements and predicted PHA-4 sites in Ph-E promoter regions. For simplicity, positions and sequences of PHA-4 sites are only given for *C. elegans* promoters. Only conserved temporal elements are listed. PHA-4 sites are also conserved, though in some cases the sequence of the site is different in *C. briggsae*. Not all PHA-4 sites are shown; for the sake of clarity, we preferentially list sites with the highest relative affinity. When both multiple unknown and low affinity sites are found, we indicate these. Sites

were identified with ClusterBuster (Frith et al., 2003) using the following parameters: The cluster threshold (C) and gap parameters (g) for all these motifs were 0 and 35 respectively. The motif threshold (m) used for Early-1 (E1), Early-2 (E2) and E1var was 6 and for PHA-4 was 5.

| Gene     | Temporal Element                 | PHA-4 Sites                             |
|----------|----------------------------------|-----------------------------------------|
| C03A7.7  | E1var (-428), L1 (-75)           | TGTTTGC (high, -170)                    |
| C23H3.9  | L2 (-51, -418)                   | TATTTGT (low, -26)                      |
| C49G7.4  | -                                | TATTGGT (unk, -236)                     |
| D1054.9  | E1 (-95)                         | TGTTTAT, TGTTGAT (unk, -224, unk, -287) |
| E01G6.1  | L1 (-190), L2 (-57, -185)        | TATTTGT (low, -90)                      |
| F08B12.4 | L1 (-390), L2 (-356)             | TGTTTGT (med, -492)                     |
| F12F3.1  | -                                | None                                    |
| F22A3.1  | -                                | TGTTTAC (high, -18)                     |
| F44A2.5  | -                                | TATTTGC, TATTGAT (unk, -270, unk, -281) |
| F45G2.2  | -                                | TGTTGAT (unk, -369)                     |
| F48C5.1  | -                                | TGTTTGT (med, -473)                     |
| F53B3.3  | L2 (-17, -72)                    | TGTTTGC (high, -169)                    |
| F53H4.5  | E2 (-276)                        | TGTTTGC (high, -111)                    |
| F54E2.3  | E1var (-164), L2 (-388)          | TGTTTAC (high, -381)                    |
| F58G4.1  | -                                | TGTTTGC (high, -217)                    |
| H30A04.1 | -                                | None                                    |
| K06A1.3  | E1 (-190, -230), E2 (-119)       | TGTTTGT (med, -82)                      |
| M88.4    | -                                | None                                    |
| R07B1.9  | L1 (-41)                         | TGTTTGC (high, -222)                    |
| R11G1.4  | L1 (-200, -326)                  | TATTGAT, TATTTGC (unk, -44, unk, -128)  |
| T03F1.11 | L1 (-193, -213, -220), L2 (-292) | TGTTTGT (med, -216)                     |
| T04C9.4  | L1 (-132)                        | TGTTTGC (high, -256)                    |
| T05B4.11 | L2 (-15, -477)                   | TATTGAT (unk, -298)                     |
| T05B4.3  | L2 (-372)                        | None                                    |
| T06E4.7  | -                                | None                                    |
| T06E4.8  | L2 (-88)                         | none                                    |
| T11B7.4  | no upstream alignment available  |                                         |
| T11F9.12 | E1 (-82, -108, -216), L1 (-107)  | TGTTTGT (med, -184)                     |
| T18D3.4  | L1 (-41), L2 (-19, -116)         | TGTTTGC (high, -425)                    |
| T23F1.6  | -                                | TGTTTGC (high, -139)                    |
| T25E4.1  | E1 (-366), L1 (-93), L2 (-438)   | TATTTGT (low, -47)                      |
| W06D12.3 | -                                | TGTTTGC (high, -246)                    |
| ZK1067.7 | E1var (-78), L2 (-215)           | TATTTGT (low, -441)                     |
| ZK662.2  | L1 (-46)                         | TGTTTGC (high, -97)                     |
| ZK673.7  | -                                | None                                    |

**Supplemental Table 4B.** Occurrence of conserved temporal elements and predicted PHA-4 sites in Ph-L promoter regions. For simplicity, positions and sequences of PHA-4 sites are only given for *C. elegans* promoters. Only conserved temporal elements are listed. PHA-4 sites are also conserved, though in some cases the sequence of the site is different in *C. briggsae*. Not all PHA-4 sites are shown; for the sake of clarity, we preferentially list sites with the highest relative affinity. When both multiple unknown and low affinity sites are found, we indicate these. Sites were identified using ClusterBuster (Frith et al., 2003) using the following parameters. The cluster threshold (C) and gap parameters (g) for all these motifs are 0 and 35 respectively. The motif threshold (m) used for Late-1 (L1) was 6 whereas for Late-2 (L2) it was 7. The motif threshold used for PHA-4 was 5.
