# Supplementary material for: Whole-Genome Analysis of Temporal Gene Expression during Foregut Development
Source: PubMed Central journal article supplement (PMC523228; doi:10.1371/journal.pbio.0020352), 2004-10-19
Supplement: pbio.0020352.st005.pdf [file pbio.0020352.st005.pdf]

| <b>Gene</b> | <b>Name</b>   | <b>Expression</b>                                              | <b>Reference</b>                      |
|-------------|---------------|----------------------------------------------------------------|---------------------------------------|
| B0222.8     | <i>col-10</i> | hypodermis                                                     | Liu et al., 1995                      |
| B0507.1*    |               | early pharynx                                                  | YK                                    |
| C09D1.1     | <i>unc-89</i> | early pharyngeal muscle                                        | Benian et al., 1996.                  |
| C14F5.1     |               | not visible                                                    | YK                                    |
| C16C4.2     |               | NA                                                             |                                       |
| C23H3.4     |               | early pharyngeal                                               | YK                                    |
| C31A11.7    |               | NA                                                             |                                       |
| C42C1.2     |               | NA                                                             |                                       |
| C54D1.4     | <i>alh-10</i> | not visible                                                    | YK                                    |
| D2045.8     |               | NA                                                             |                                       |
| F10E7.4     |               | non-pha head and early broad                                   | YK                                    |
| F11C3.3     | <i>unc-54</i> | muscle, intestinal and rectal muscle cells                     | Miller et al., 1983                   |
| F11E6.8*    |               | early pharynx                                                  | YK                                    |
| F13E6.4     |               | NA                                                             |                                       |
| F13H8.4*    |               | NA                                                             |                                       |
| F18A11.4    |               | NA                                                             |                                       |
| F26F12.4*   |               | early pharynx                                                  | YK                                    |
| F31F6.7     |               | NA                                                             |                                       |
| F39D8.1     | <i>pqn-36</i> | larval pharynx                                                 | YK                                    |
| F41H10.8*   |               | early pharynx                                                  |                                       |
| F48F7.2     |               | broad expression in embryos, but enriched in pharynx           | YK                                    |
| F49A5.8     | <i>srw-23</i> | NA                                                             |                                       |
| F49H12.5    |               | complex embryonic expression, including hypodermis and pharynx | YK                                    |
| F52D1.3     | <i>pqn-40</i> | intestine and non-pharyngeal head cells                        | YK                                    |
| F58A6.6     |               | NA                                                             |                                       |
| H13N06.3    | <i>gob-1</i>  | early intestine and pharynx                                    | J. Kormish and J. McGhee, pers. comm. |
| K07D8.1     | <i>mup-4</i>  | late embryonic pharynx and muscle                              | Hong et al., 2001                     |
| K07G5.1     |               | Early embryonic head, including pharynx                        | YK                                    |
| K08A2.4     |               | NA                                                             |                                       |
| R04B5.4     | <i>nhr-12</i> | NA                                                             |                                       |
| T07D1.4     | <i>fox-1</i>  | broad expression in early embryos, pharynx-enriched            | YK                                    |
| T10G3.1     |               | NA                                                             |                                       |
| T14G11.1    |               | NA                                                             |                                       |
| T19A5.3     |               | NA                                                             |                                       |
| T25B9.9     |               | embryonic intestine and pharynx (weak)                         | YK                                    |
| W04G5.7     |               | NA                                                             |                                       |

---

|           |              |             |    |
|-----------|--------------|-------------|----|
| Y40B1B.6  | <i>spr-5</i> | adult gonad | YK |
| Y54E10A.9 | <i>vbh-1</i> | gonad       | YK |
| Y66D12A.7 |              | NA          |    |
| ZK381.5   |              | NA          |    |

---

**Supplemental Table 5A.** List of genes containing conserved Early-1, Early-2 and PHA-4 sites within 500 bp upstream of their predicted start codons. Green genes are expressed in the pharynx, while red genes are not; \* = genes identified as positives in our microarray experiments. 'NA' = no expression pattern information available. For references, 'YK' refers to the Kohara group's Nematode Expression Pattern Database (NEXTDB); interpretation of the available *in situ* hybridization patterns was performed by the authors of this paper. The ClusterBuster (Frith et al. 2003) parameters for E1+E2 combined were C=3.5, m=6 g=35. The PHA-4 parameters were C=1.9, m=6, g=35.

| Gene      | Name           | Expression                                                       | Reference                    |
|-----------|----------------|------------------------------------------------------------------|------------------------------|
| B0222.8*  | <i>col-10</i>  | Hypodermis                                                       | Liu <i>et al.</i> , 1995.    |
| B0495.2   |                | gonad/germline                                                   | YK                           |
| B0511.12  |                | gonad/germline                                                   | YK                           |
| C01C4.3   |                | not visible                                                      | YK                           |
| C01G8.2   | <i>cln-3.2</i> | NA                                                               |                              |
| C04C3.3   |                | larval intestine and pharynx                                     | YK                           |
| C04E12.2  |                | NA                                                               |                              |
| C05C10.1  |                | NA                                                               |                              |
| C05D9.5   | <i>ife-4</i>   | NA                                                               |                              |
| C09D1.1*  | <i>p hm-1</i>  | early pharyngeal muscle                                          | Benian <i>et al.</i> , 1996. |
| C11H1.3   |                | NA                                                               |                              |
| C13B9.2   |                | NA                                                               |                              |
| C13G3.1   |                | NA                                                               |                              |
| C14C11.8  | <i>pqn-13</i>  | early pharyngeal muscle and marginal cells                       | YK, Ao <i>et al.</i>         |
| C15H9.10  |                | NA                                                               |                              |
| C17A2.6   |                | NA                                                               |                              |
| C25A11.1  |                | NA                                                               |                              |
| C28C12.4  |                | NA                                                               |                              |
| C30F12.5  |                | NA                                                               |                              |
| C31A11.7* |                | NA                                                               |                              |
| C33G8.11  | <i>nhr-107</i> | NA                                                               |                              |
| C33G8.6   | <i>nhr-42</i>  | not visible                                                      | YK                           |
| C35D10.16 | <i>arx-6</i>   | not visible                                                      | YK                           |
| C38D4.6   | <i>p al-1</i>  | many early embryonic cells, including pharyngeal lineages        |                              |
| C43F9.6   |                | not visible                                                      | YK                           |
| C46F4.2   |                | intestine and other non-pharyngeal cells                         | YK                           |
| C47D12.2  |                | gonad/germline                                                   | YK                           |
| C48E7.6   |                | Mid-late embryonic intestine and pharynx                         | YK                           |
| C50F4.7   | <i>his-37</i>  | Broad, possibly ubiquitous                                       | YK                           |
| C55B6.2   | <i>dnj-7</i>   | ubiquitous                                                       | YK                           |
| D1054.13  |                | NA                                                               |                              |
| F02E8.6   | <i>nrc-1</i>   | Larval pharynx and proximal gonad                                | YK                           |
| F07C3.8   | <i>str-94</i>  | NA                                                               |                              |
| F09C6.9   | <i>nhr-116</i> | NA                                                               |                              |
| F11A10.7  |                | Broad expression in embryos; also in adult gonad                 | YK                           |
| F11C3.3*  | <i>unc-54</i>  | Body muscle                                                      | Miller <i>et al.</i> , 1983. |
| F13G3.9   | <i>mif-3</i>   | Early embryos: body muscle, vulval muscles and pharyngeal muscle | Marson <i>et al.</i> , 2001. |

---

|           |               |                                                                                        |                              |
|-----------|---------------|----------------------------------------------------------------------------------------|------------------------------|
| F13H8.4*  |               | NA                                                                                     |                              |
| F14B4.1   |               | Early pharynx                                                                          | YK                           |
| F16H11.2  |               | NA                                                                                     |                              |
| F20G2.3   |               | NA                                                                                     |                              |
| F25H8.3   | <i>gon-1</i>  | Distal tip cells, body muscle                                                          | Blelloch and Kimble, 1999.   |
| F31D4.2   |               | NA                                                                                     |                              |
| F31E8.4   |               | NA                                                                                     |                              |
| F35H10.3  |               | NA                                                                                     |                              |
| F36H2.2   |               | NA                                                                                     |                              |
| F37B12.1  |               | NA                                                                                     |                              |
| F37C12.3  |               | not visible                                                                            | YK                           |
| F40H3.4   | <i>fkh-8</i>  | Neuronal                                                                               | Hope <i>et al.</i> , 2003.   |
| F41H10.8* |               | Early pharynx                                                                          | YK                           |
| F45E1.6   | <i>his-71</i> | Intestine or gonad                                                                     | YK                           |
| F45F2.3   | <i>his-5</i>  | NA                                                                                     |                              |
| F46C5.1   |               | Adult gonad/germline                                                                   | YK                           |
| F47D12.7  |               | Early pharynx and late larval somatic gonad                                            | YK                           |
| F47G6.2   |               | NA                                                                                     |                              |
| F49E2.1   |               | Intestine                                                                              | YK                           |
| F52A8.5   |               | not visible                                                                            | YK                           |
| F52E1.13  |               | Early intestine and faint pharynx                                                      | YK                           |
| F54D5.11  |               | Gonad/germline                                                                         | YK                           |
| F55G1.7   |               | NA                                                                                     |                              |
| F58B3.9   |               | Early pharynx                                                                          | YK                           |
| F58E10.1  |               | Larval pharynx                                                                         | YK                           |
| F58H1.5   |               | not visible                                                                            | YK                           |
| F59B8.2   |               | Broad in very early embryo, but becomes intestinal and pharynx enriched by comma stage | YK                           |
| F59C12.2  | <i>ser-1</i>  | Pharyngeal muscle, body muscle, neurons, vulva                                         | Tsalik <i>et al.</i> , 2003. |
| F59F4.2   |               | gonad/germline                                                                         | YK                           |
| K07C11.4  |               | Early pharynx                                                                          | YK, this paper               |
| K07D8.1*  | <i>mup-4</i>  | Late embryonic pharynx and muscle                                                      | Hong <i>et al.</i> , 2001.   |
| K07G5.1*  |               | Early embryonic head, including pharynx                                                | YK                           |
| K08A2.4   |               | Intestine or gonad                                                                     | YK                           |
| K08F11.5  |               | weak gonad/germline                                                                    | YK                           |
| R03H4.1   |               | NA                                                                                     |                              |
| R04B5.4*  | <i>nhr-12</i> | NA                                                                                     |                              |
| R07B1.4   | <i>gst-36</i> | NA                                                                                     |                              |
| R07B7.3   | <i>pqn-53</i> | broad; possibly ubiquitous                                                             | YK                           |
| R13F6.4   |               | NA                                                                                     |                              |

---

---

|            |                |                                                                              |                                    |
|------------|----------------|------------------------------------------------------------------------------|------------------------------------|
| T01C3.5    |                | NA                                                                           |                                    |
| T02E9.2    | <i>grl-7</i>   | non-pharyngeal (can't determine cell type)                                   | YK                                 |
| T02G5.7    |                | broad expression in early embryos, later becoming intestine-specific         | YK                                 |
| T04F8.4    |                | NA                                                                           |                                    |
| T05A6.1    | <i>cki-1</i>   | Early pharynx and other tissues later                                        | Hong <i>et al.</i> , 1998.         |
| T06E4.4    | <i>col-147</i> | Hypodermis                                                                   | YK                                 |
| T09A5.4    |                | NA                                                                           |                                    |
| T09B4.4    |                | NA                                                                           |                                    |
| T10E10.2   | <i>col-167</i> | NA                                                                           |                                    |
| T10E10.5   | <i>col-169</i> | NA                                                                           |                                    |
| T14A8.1    | <i>ric-3</i>   | Early pharynx muscle, body muscle and neurons                                | Halevi <i>et al.</i> , 2002., YK   |
| T14G11.1*  |                | NA                                                                           |                                    |
| T16G1.1    | <i>pqn-67</i>  | NA                                                                           |                                    |
| T19A5.2    | <i>gck-1</i>   | not visible                                                                  | YK                                 |
| T19D2.1    |                | larval rectum                                                                | YK                                 |
| T22C1.1    |                | not visible                                                                  | YK                                 |
| T22C1.7    | <i>jph-1</i>   | Body muscle, neurons and pharynx muscle                                      | GuhaThakurta <i>et al.</i> , 2002. |
| T27B7.4    | <i>nhr-115</i> | NA                                                                           |                                    |
| W01A8.2    |                | not visible                                                                  | YK                                 |
| Y102A11A.7 |                | NA                                                                           |                                    |
| Y10G11A.2  |                | NA                                                                           |                                    |
| Y116A8C.36 |                | NA                                                                           |                                    |
| Y22D7AR.13 | <i>ser-4</i>   | Neurons, including pharyngeal neurons                                        | Tsalik <i>et al.</i> , 2003.       |
| Y34B4A.8   |                | NA                                                                           |                                    |
| Y37A1A.1   |                | NA                                                                           |                                    |
| Y37A1C.1   |                | Weak early embryonic pharynx and stronger larval pharynx, gonad              | YK                                 |
| Y39B6A.21  |                | NA                                                                           |                                    |
| Y39G8B.1   |                | Intestine                                                                    | YK                                 |
| Y41D4B.16  |                | NA                                                                           |                                    |
| Y45F3A.2   | <i>rab-30</i>  | NA                                                                           |                                    |
| Y54E10A.9* | <i>vbh-1</i>   | gonad/germline                                                               | YK                                 |
| Y54G11A.10 | <i>lin-7</i>   | larval intestine                                                             | Hope lab                           |
| Y57A10A.19 |                | NA                                                                           |                                    |
| Y67A6A.2   | <i>nhr-62</i>  | not visible                                                                  | YK                                 |
| Y71F9B.7   | <i>plk-2</i>   | Broad in very early embryos, also in gonad/germline                          | YK                                 |
| Y71G10AL.1 |                | NA                                                                           |                                    |
| Y75B8A.3   |                | Broad in early embryos, becoming pharynx specific in late embryos and larvae | YK                                 |

---

---

|          |               |                |                               |
|----------|---------------|----------------|-------------------------------|
| ZC487.5  | <i>gri-8</i>  | NA             |                               |
| ZK1010.2 |               | NA             |                               |
| ZK1010.8 |               | not visible    | YK                            |
| ZK430.7  |               | NA             |                               |
| ZK792.3  | <i>inx-9</i>  | sheath cells   | Starich <i>et al.</i> , 2001. |
| ZK836.2  |               | gonad/germline | YK                            |
| ZK858.4  | <i>mel-26</i> | NA             |                               |

---

**Supplemental Table 5B.** List of genes containing conserved E1var, Early-2 and PHA-4 sites within 500 bp upstream of their predicted start codons. Green genes are expressed in the pharynx, while red genes are not; \* = genes identified in searches for Early-1, Early-2 and PHA-4 sites (see Table 6A, above). ‘NA’ = no expression pattern information available. For references, ‘YK’ refers to the Kohara group’s Nematode Expression Pattern Database (NEXTDB); interpretation of the available *in situ* hybridization patterns was performed by the authors of this paper. The ClusterBuster (Frith et al., 2003) parameters for E1var +E2 combined were C=1, m=5.5 g=35. The PHA-4 parameters were C=2, m=6, g=35.

| Gene     | Name          | Expression                                                                           | Reference                       |
|----------|---------------|--------------------------------------------------------------------------------------|---------------------------------|
| B0414.7  | <i>mtk-1</i>  | NA                                                                                   |                                 |
| C06E1.3  |               | NA                                                                                   |                                 |
| C09D4.3  |               | distal gonad                                                                         | YK                              |
| C10H11.5 |               | NA                                                                                   |                                 |
| C13D9.7  | <i>ncx-8</i>  | NA                                                                                   |                                 |
| C13G3.1  |               | NA                                                                                   |                                 |
| C14H10.1 |               | embryonic, non-pharyngeal                                                            | YK                              |
| C24A1.2  |               | mid-embryonic pharynx                                                                | YK                              |
| C25B8.7  |               | NA                                                                                   |                                 |
| C25E10.5 |               | broad non-pharyngeal expression in embryo                                            | YK                              |
| C28C12.4 |               | NA                                                                                   |                                 |
| C42C1.5  |               | NA                                                                                   |                                 |
| C43F9.6  |               | larval and adult gonad                                                               | YK                              |
| C50F4.8  |               | NA                                                                                   |                                 |
| C52B9.11 |               | NA                                                                                   |                                 |
| F08B12.3 | <i>slo-2</i>  | larval neurons and pharynx                                                           | Yuan <i>et al.</i> , 2000.      |
| F09E8.2  | <i>msh-5</i>  | not visible                                                                          | YK                              |
| F09G2.5  |               | NA                                                                                   |                                 |
| F10D7.5  |               | late embryonic pharynx                                                               | YK                              |
| F14B8.6  |               | late embryonic pharynx and intestine                                                 | YK                              |
| F18E2.3  | <i>scc-3</i>  | larval and adult gonad                                                               | Pasierbek <i>et al.</i> , 2003. |
| F22E5.16 | <i>sri-57</i> | NA                                                                                   |                                 |
| F28H1.3  | <i>ars-2</i>  | late embryonic expression, possibly ubiquitous                                       | YK                              |
| F33E11.1 | <i>nhr-15</i> | NA                                                                                   |                                 |
| F35G12.4 |               | larval and adult gonad                                                               | YK                              |
| F36H1.4  | <i>lin-3</i>  | larval and adult pharynx, gonad and vulval cells                                     | Hwang and Sternberg, 2003.      |
| F36H2.2  |               | NA                                                                                   |                                 |
| F37B12.1 |               | NA                                                                                   |                                 |
| F40E10.3 | <i>csq-1</i>  | body wall muscle and mid-late embryonic pharynx expression                           | YK                              |
| F40H3.4  | <i>fkh-8</i>  | non-pharyngeal neurons                                                               | Hope <i>et al.</i> , 2003.      |
| F43C9.2  |               | NA                                                                                   |                                 |
| F46B6.9  |               | NA                                                                                   |                                 |
| F49E8.5  | <i>dif-1</i>  | broad expression in early embryos followed by expression in hypodermis and intestine | Ahringer, 1995.                 |
| F52E4.6  | <i>wrt-2</i>  | seam cells                                                                           | Aspöck <i>et al.</i> , 1999.    |
| F55F3.3  |               | larval and adult gonad                                                               | YK                              |
| F58G6.7  |               | NA                                                                                   |                                 |

|            |                |                                                                        |                               |
|------------|----------------|------------------------------------------------------------------------|-------------------------------|
| K07A1.8    |                | larval and adult gonad                                                 | YK                            |
| K09H9.6    | <i>lpd-6</i>   | NA                                                                     |                               |
| K12G11.3   |                | larval and adult pharynx and intestine                                 | YK                            |
| LLC1.1     | <i>tra-3</i>   | NA                                                                     |                               |
| R07B1.9    |                | late embryonic pharynx                                                 | this paper                    |
| T03F1.6    |                | anterior region of embryos, including pharyngeal cells                 | IH                            |
| T04C9.4    | <i>mip-1</i>   | NA                                                                     |                               |
| T05C3.2    |                | larval neurons (non-pharyngeal)                                        | IH                            |
| T21D12.12  |                | NA                                                                     |                               |
| T23E7.2    |                | late embryonic and larval expression in body muscle and pharynx (weak) | YK                            |
| T27F7.1    |                | expression along body of late larvae and adults (non-pharyngeal)       | YK                            |
| T28D6.9    | <i>pen-2</i>   | broad non-pharyngeal expression                                        | Francis <i>et al.</i> , 2002. |
| W02F12.2   |                | NA                                                                     |                               |
| W04A4.5    |                | Intestine                                                              | YK                            |
| W10C6.1    | <i>mat-2</i>   | broad expression in early embryos, also in larval and adult gonad      | YK                            |
| Y32F6A.5   |                | NA                                                                     |                               |
| Y47G7B.3   | <i>sri-60</i>  | NA                                                                     |                               |
| Y60A3A.8   |                | NA                                                                     |                               |
| Y75B8A.3   |                | larval and adult pharynx                                               | YK                            |
| Y77E11A.15 | <i>col-106</i> | expressed along body of adult                                          | YK                            |
| Y92H12BL.1 |                | NA                                                                     |                               |
| ZK1290.2   | <i>tph-1</i>   | larval pharyngeal and non-pharyngeal neurons                           | Sze <i>et al.</i> , 2000.     |
| ZK430.7    |                | NA                                                                     |                               |
| ZK6.7      |                | NA                                                                     |                               |
| ZK836.2    |                | adult gonad                                                            | YK                            |

**Supplemental Table 5C.** List of genes containing conserved Late-1, Late-2 and PHA-4 sites within 500 bp upstream of their predicted start codons. Green genes are expressed in the pharynx, while red genes are not. ‘NA’ = no expression pattern information available. For references, ‘IH’ refers to Ian Hope’s expression pattern database (via WormBase) and ‘YK’ refers to the Kohara group’s Nematode Expression Pattern Database (NEXTDB); interpretation of the available *in situ* hybridization patterns was performed by the authors of this paper. The ClusterBuster (Frith *et al.*, 2003) parameters for L1 +L2 combined are C=2, m=6 g=35. The PHA-4 parameters are C=2.5, m=6, g=35.
